# Supplementary material for: Camu-Camu Reduces Obesity and Improves Diabetic Profiles of Obese and Diabetic Mice: A Dose-Ranging Study
Source: MDPI journal article supplement (doi:10.3390/metabo12040301), 2022-03-29
Supplement: s1 [file s1]

**Table S1.** Camu-camu extract specification.

| <b>CAMU CAMU FRUIT PE 20% ASORBIC ACID</b> |                                                                                                                                                                                                                                                                                                                                 |
|--------------------------------------------|---------------------------------------------------------------------------------------------------------------------------------------------------------------------------------------------------------------------------------------------------------------------------------------------------------------------------------|
| <b>Description</b>                         | <p>Powdered extract obtained from Camu Camu fruits</p> <p>Botanical name: <i>Myciaria dubia</i> (Kunth) Mc Vaugh</p> <p>Plant part used: fruits</p> <p>Extraction solvent: Water 100%</p> <p>Native Extract Ratio: 8-10 / 1</p> <p>100 mg of extract equivalent to an average of 720 mg of dry <i>Myciaria dubia</i> fruits</p> |
| <b>Specifications</b>                      | <p>Aspect: powder</p> <p>Color: Cream to pink</p> <p>Flavor: Characteristic</p> <p>Solubility: Dispersible in water</p>                                                                                                                                                                                                         |

**Table S2.** Quantitative PCR primer sequences for the targeted mouse genes.

| <b>Gene</b>      | <b>Forward sequence</b>   | <b>Reverse sequence</b>   |
|------------------|---------------------------|---------------------------|
| <i>mGdf15</i>    | TGGGACCCCAATCTCACCTCT     | AGCCGAGAGGACTCGAACTCA     |
| <i>mFgf21</i>    | AAAGCCTCTAGGTTTCTTTGCCA   | CCTCAGGATCAAAGTGAGGCG     |
| <i>mAcox1</i>    | CAAAGAAACCCCTCCAGCC       | GCTGTGTGCCGTCTGGAGT       |
| <i>mPpara</i>    | CCCTGTTTGTGGCTGCTATAATT   | GGGAAGAGGAAGGTGTCATCTG    |
| <i>mFas</i>      | GGGTTCTAGCCAGCAGAGTC      | TCAGCCACTTGAGTGTCTCT      |
| <i>mAcc1</i>     | TGTACAAGCAGTGTGGGCTGGCT   | CCACATGGCCTGGCTTGGAGGG    |
| <i>mChrepb</i>   | ACCTCTTCGAGTGCTTGAGCC     | GTTGCACATACTGAATGTACCAGGC |
| <i>mShrepb1c</i> | GGAAGCTGTCGGGGTAGCGTC     | CATGTCTTCAAATGTGCAATCCAT  |
| <i>mI1b</i>      | CAACCAACAAGTGATATTCTCGATG | GATCCACACTCTCCAGCTGCA     |
| <i>mTnfa</i>     | GGGACAGTGACCTGGACTGT      | TTCGGAAAGCCCATTGAGT       |
| <i>mHprt1</i>    | GTTCTTTGCTGACCTGCTGGAT    | CCCCGTTGACTGATCATTACAG    |
| <i>mHsl</i>      | GCTAGCCAGGCTCATCTCCT      | GTTCTTGAGGTAGGGCTCGT      |
| <i>mAtgl</i>     | ACAGCTCCACCAACATCCAC      | AGCCCTGTTTGACATCTCT       |
| <i>mUcp1</i>     | GCTACACGGGGACCTACAATG     | CGTCATCTGCCAGTATTTTGT     |
| <i>mPgc1a</i>    | AGCCGTGACCACTGACAACGAG    | GCTGCATGGTTCTGAGTGCTAAG   |
| <i>mDio2</i>     | AATTATGCCTCGGAGAAGACCG    | GGCAGTTGCCTAGTGAAAGGT     |
| <i>mLpl</i>      | TCTGTACGGCACAGTGG         | CCTCTCGATGACGAAGC         |
| <i>mRpl19</i>    | GAAGGTCAAAGGGAATGTGTTCA   | CCTGTTGCTCACTTGT          |
